# Supplementary material
Source: publisher figshare collection journal article supplement (https://geolsoc.figshare.com/ndownloader/files/28675313)
Supplement: Supplementary file 1 [file 28675313]

Photos of groundmass minerals on the microscope AztecLive Advanced Ultim Max 40.


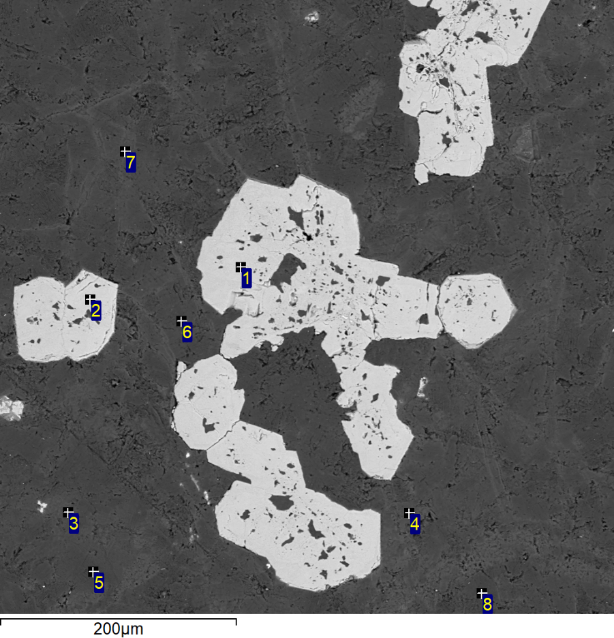


Fig. 1. Dyke 1. Area 1-1. Intergrowths of polycrystalline idiomorphic magnetite grains 200x100 microns in size.

| 1 | Mag |
| --- | --- |
| 2 | Mag |
| 3 | Talk_ |
| 4 | Talk |
| 5 | Talk |
| 6 | Talk |
| 7 | Talk |
| 8 | Talk |

Fig. 2. Dyke 1. Area 1-1. Groundmass of lamproite.

| 1 | Ilmenite |
| --- | --- |
| 2 | Apatite |
| 3 | Zircon |
| 4 | Zircon |
| 5 | Apatite |
| 6 | Talk_ |
| 7 | Chlorite |

Ilm 50x25 mµ

Ap from 2-3mµ to 250x100 mµ


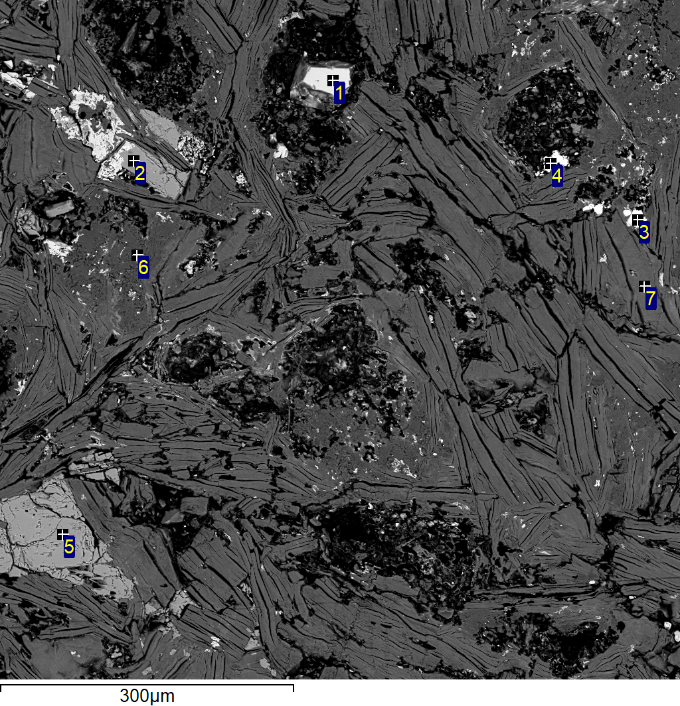


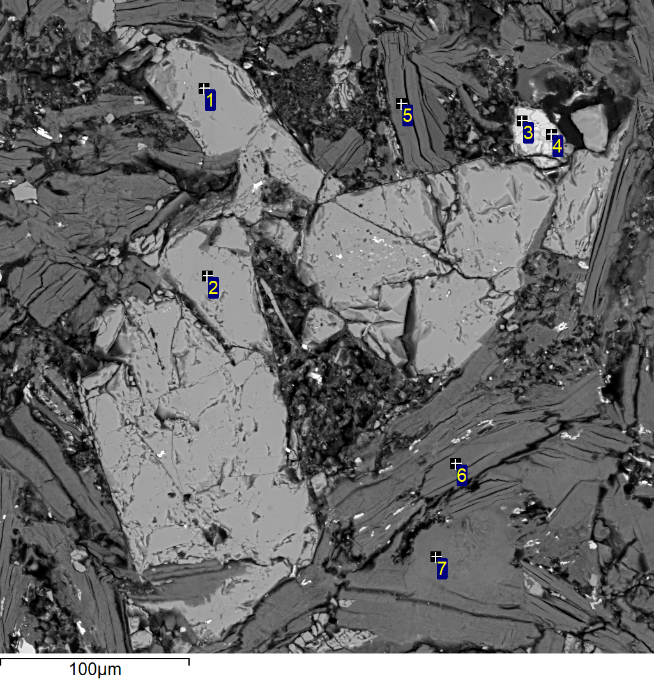


Fig. 3. Dyke 1. Area 1-1. Intergrowths of polycrystalline idiomorphic magnetite.

| 1 | Apatite |
| --- | --- |
| 2 | Apatite |
| 3 | 0xide_ |
| 4 | 0xide |
| 5 | Chlorite |
| 7 | Chlorite |

Fig. 4. Dyke 1. Area 1-1. Groundmass of lamproite. The elongated shape of apatite grains obeys the elongated shape of chlorite and talc grains.

| 8 | Apatite |
| --- | --- |
| 9 | Chlorite |
| 10 | Ilmenite |
| 11 | Apatite |
| 12 | Talk |
| 13 | Biotite |
| 14 | Apatite |
| 15 | Ilmenite |


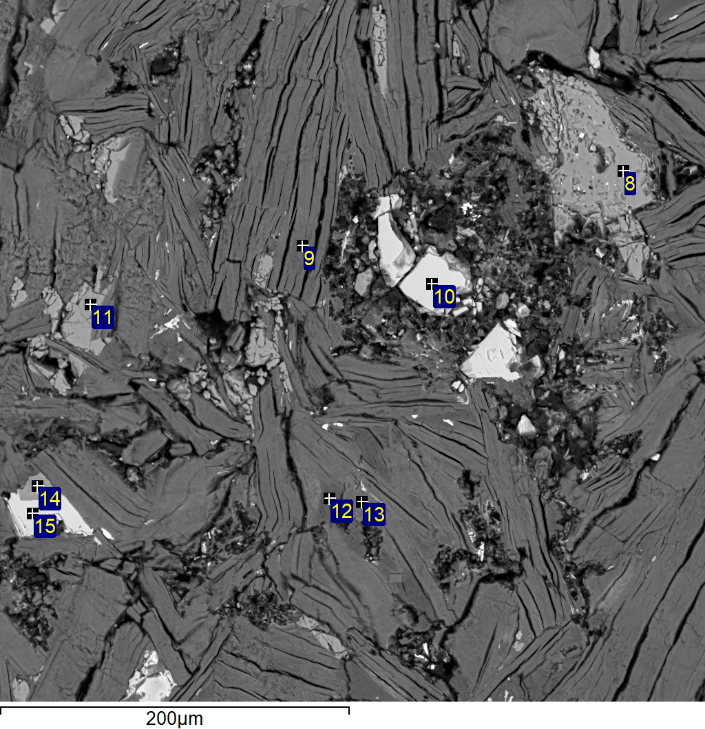


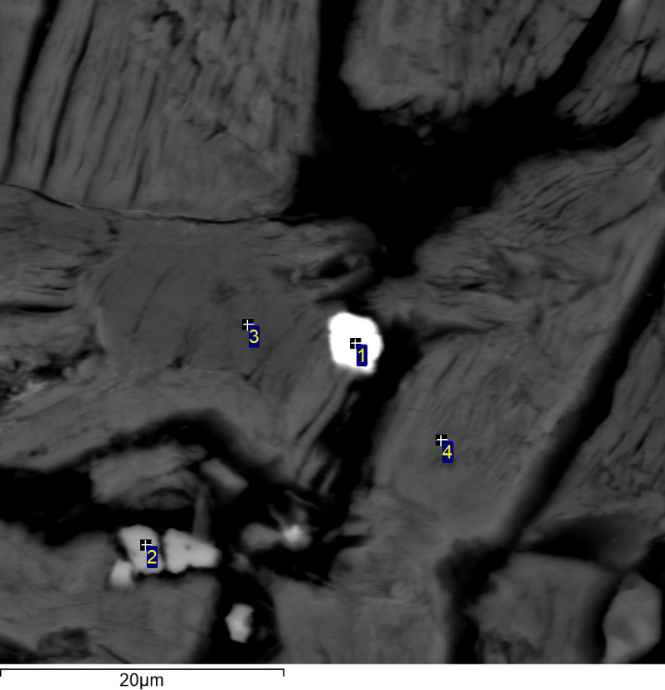


Fig. 5. Dyke 1. Area 2-1. The grain of monazite in the groundmass.

| 1 | Monazite |
| --- | --- |
| 2 | Mag |
| 3 | Talk_ |
| 4 | Chlorite |

Monazite 5x4 mµ


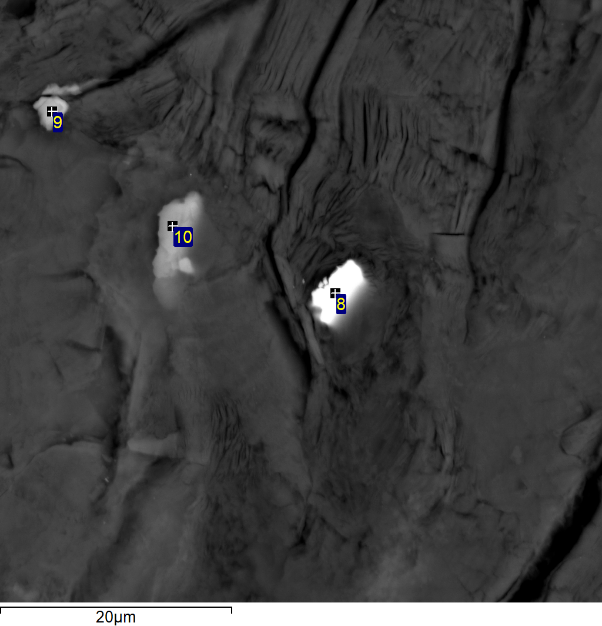


Fig. 6. Dyke 1. Area 2-1. The grains of monazite and ilmenite in the groundmass.

| 8 | Monazite |
| --- | --- |
| 9 | Ilm |
| 10 | Ilm |


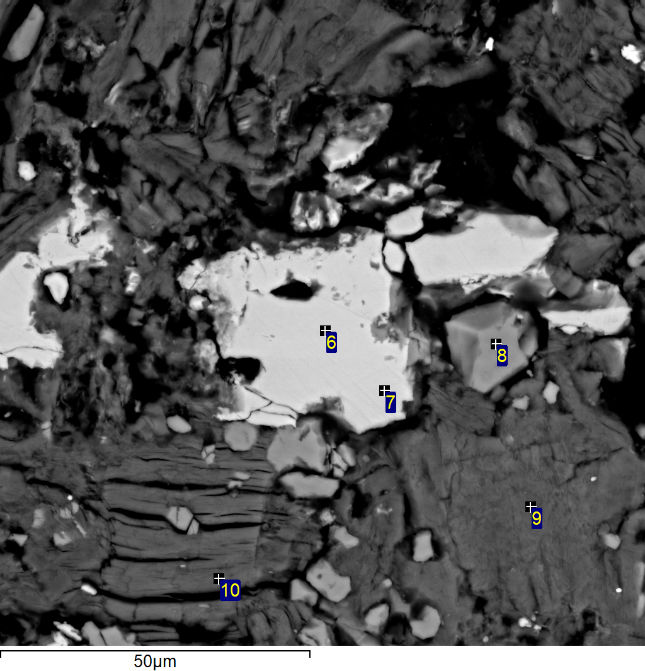


Fig. 7. Dyke 1. Area 2-2. The grain of ilmenite.

| 6 | Ilm |
| --- | --- |
| 7 | Ilm |
| 8 | Ap |
| 9 | Chlorite |
| 10 | Chlorite |


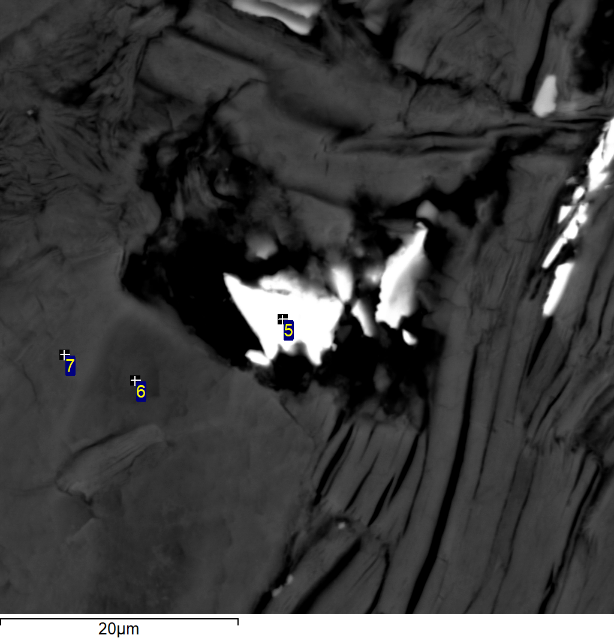


Fig.8 . Dyke 1. Area 2-2. The grains of monazite.

| 5 | Monazite |
| --- | --- |
| 6 | Chlorite |
| 7 | Chlorite |

Grain 5 of monazite 10x7 mµ


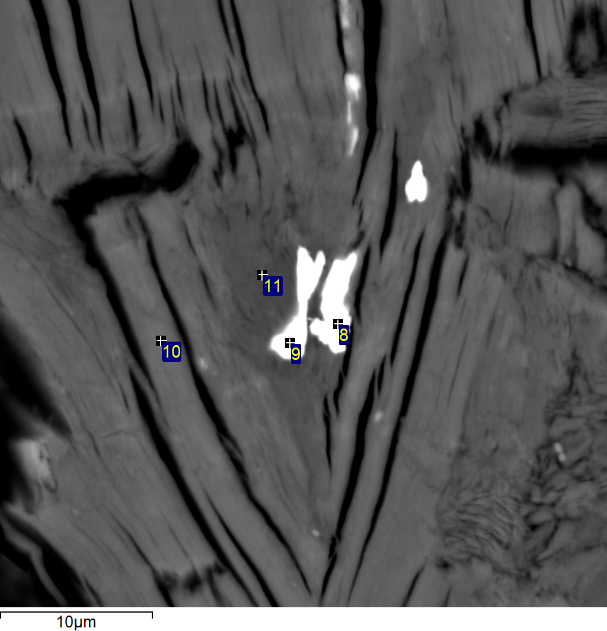


Fig. 9. Dyke 1. Area 1-2. The grains of monazite.

| 8 | Monazite |
| --- | --- |
| 9 | Monazite |
| 10 | Chlorite |
| 11 | Talk |


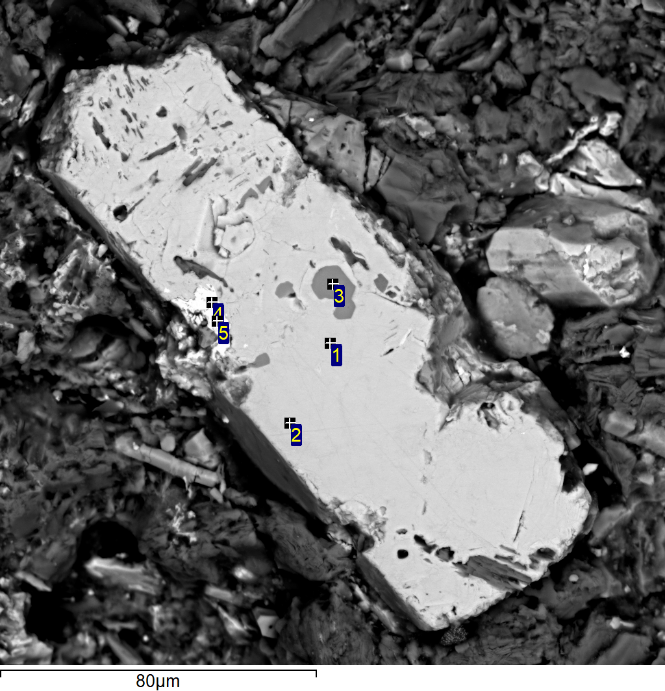


Fig. 10. Dyke 1. Area 2-1. Magnetite crystal 160x60 microns in size with inclusions of apatite and zircon.

| 1 | Mag |
| --- | --- |
| 2 | Mag |
| 3 | Apatite |
| 4 | Zircon |
| 5 | Zircon |

Fig. 11.
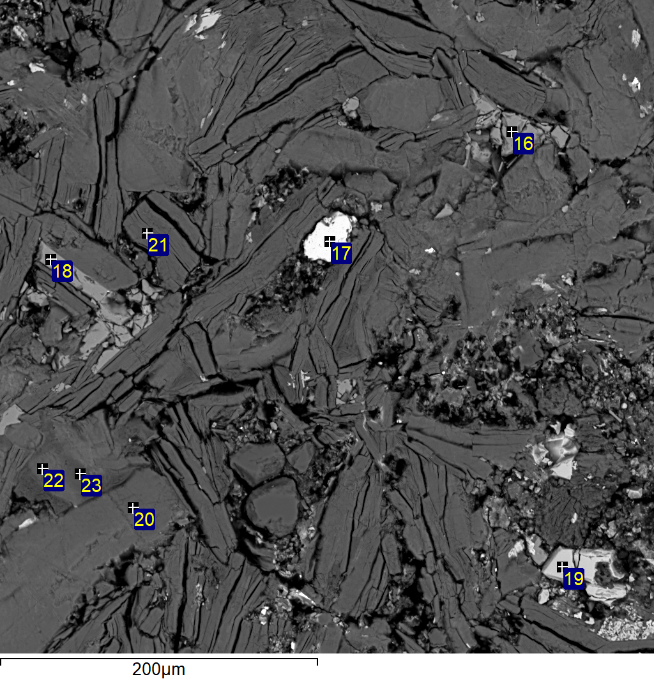
Dyke 1. Area 3-1. Groundmass of lamproite.

| 16 | Apatite |
| --- | --- |
| 17 | Zircon_ |
| 18 | Apatite |
| 19 | Ilmenite |
| 20 | Chlorite |
| 21 | Mag |
| 22 | Chlorite |
| 23 | Talk_ |

Zrc – 40x20 mµ

Ilm – 50x25 mµ


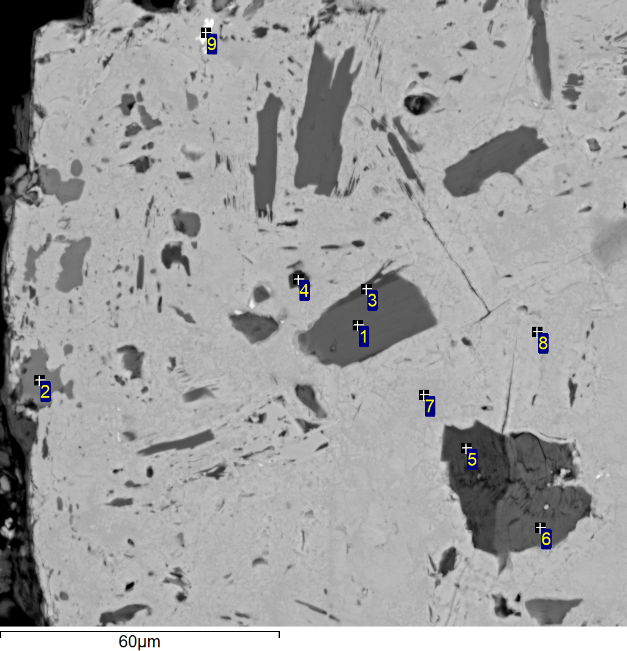


Fig. 12. Dyke 1. Area 3-1. The grain of magnetite 0.35x0.25 mm, containing tiny inclusions of groundmass fragments points 1-9):

| 1 | Biotite |
| --- | --- |
| 2 | Apatite |
| 3 | Chlorite |
| 4 | Chlorite |
| 5 | Chlorite |
| 6 | Biotite |
| 7 | Mag |
| 8 | Mag |
| 9 | Monazite |


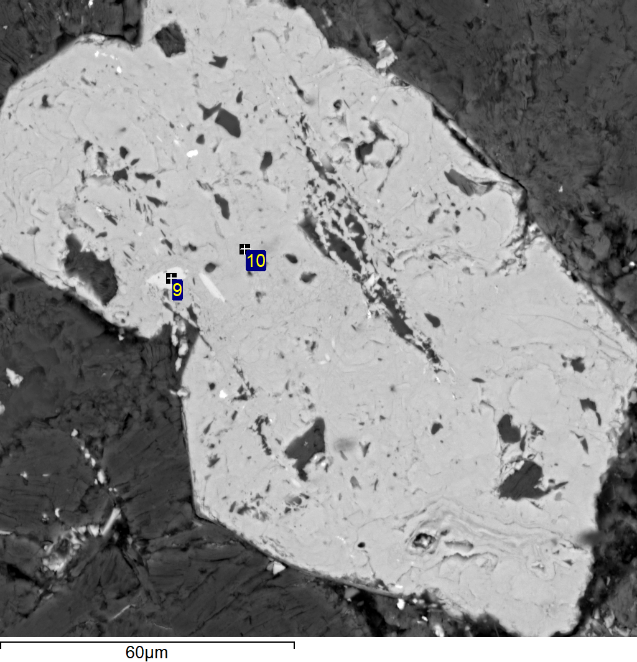


Fig. 13. Dyke 1. Area 1-2. The grain of magnetite 150x70 mµ, containing tiny inclusions of groundmass fragments points 9, 10):

| 9 | Ru |
| --- | --- |
| 10 | Mag |
